# Supplementary material for: ADGRL4/ELTD1 Silencing in Endothelial Cells Induces ACLY and SLC25A1 and Alters the Cellular Metabolic Profile
Source: MDPI journal article supplement (doi:10.3390/metabo9120287), 2019-11-25
Supplement: s1 [file s1]

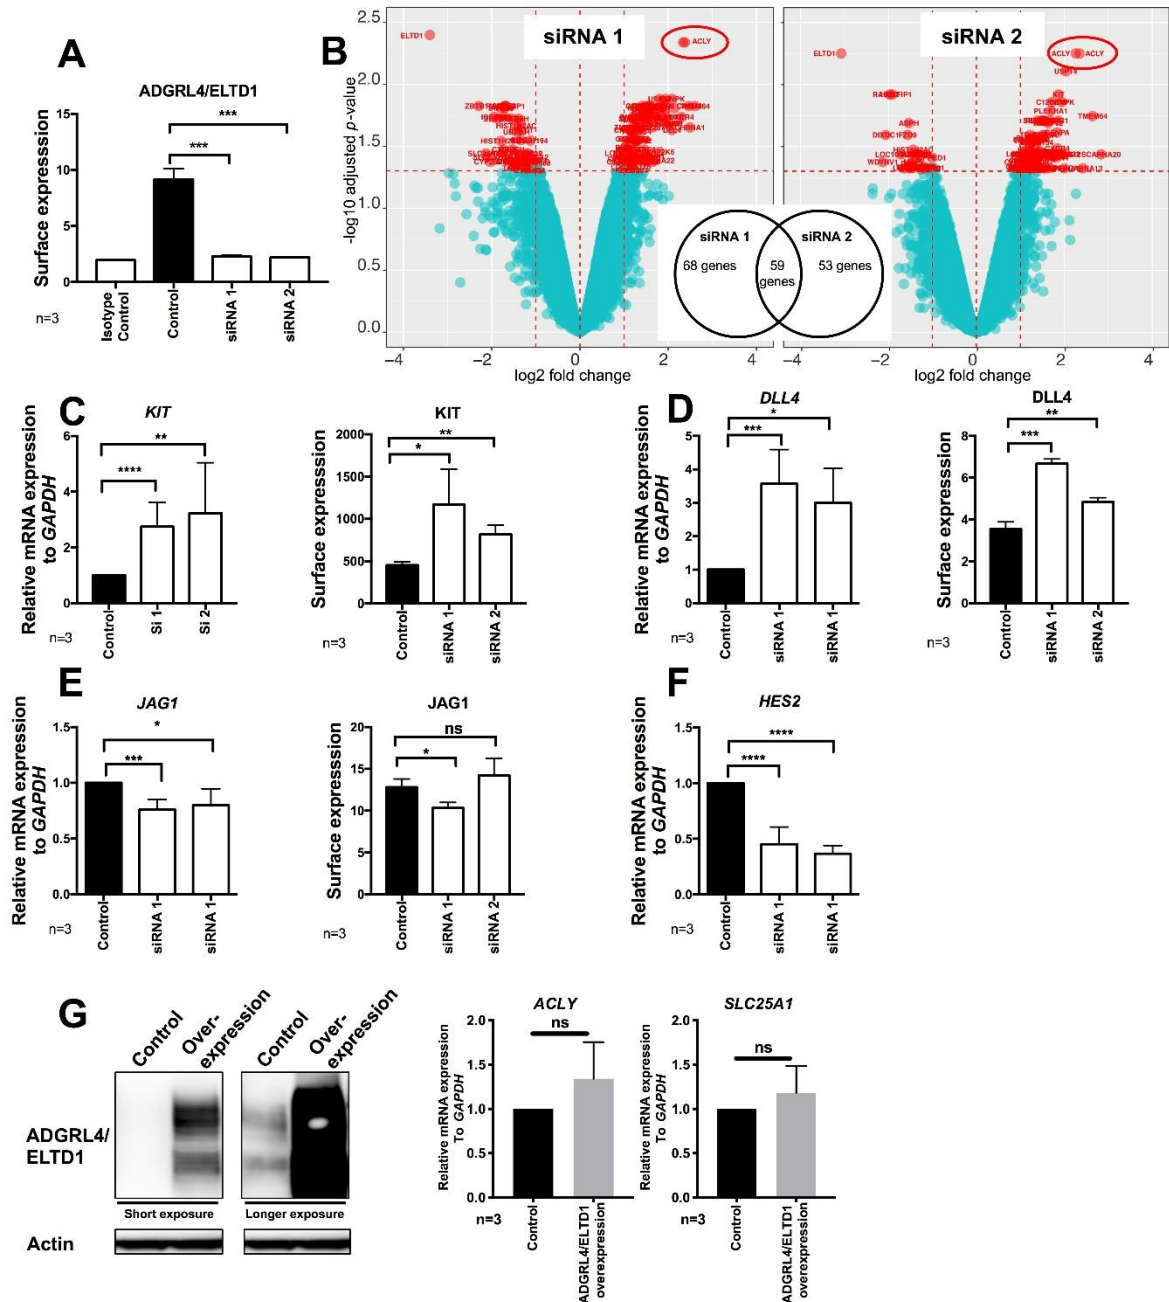

**Figure S1. Validation of additional microarray targets** (A) Quantification of FACS ADGRL4/ELTD1 surface. (B) Volcano plots and Venn diagram depicting differentially expressed genes for each siRNA. (C) *KIT* qPCR and FACS quantification of surface *KIT* protein expression. (D) *DLL4* qPCR and FACS quantification of surface *DLL4* protein expression. (E) *JAG1* qPCR and FACS quantification of surface *JAG1* protein expression. (F) *HES2* qPCR. (G) Representative western blot showing ADGRL4/ELTD1 overexpression in HUVECs (longer exposure, on the right, required to show endogenous expression in wild type HUVECs) and *ACLY* and *SLC25A1* qPCR quantification in ADGRL4/ELTD1 overexpressing HUVECs. (\*  $p \leq 0.05$ , \*\*  $p \leq 0.01$ , \*\*\*  $p \leq 0.001$ , \*\*\*\*  $p \leq 0.0001$ )

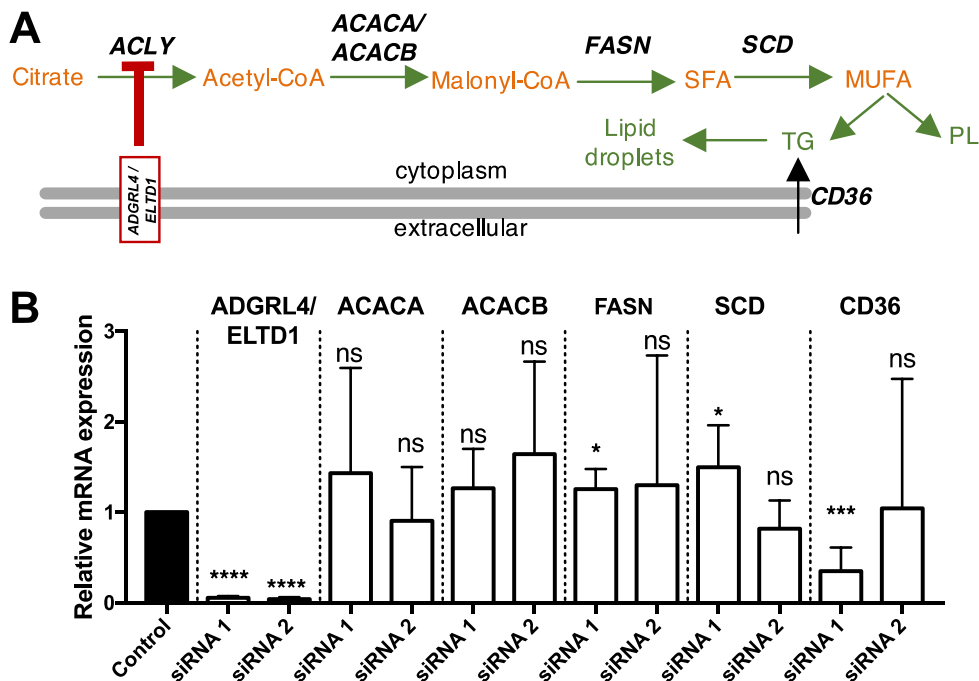

**Figure S2. HUVEC ADGRL4/ELTD1 silencing does not affect fatty acid synthesis pathway genes.** (A) The fatty acid synthesis and cholesterol pathways. Key fatty acid synthesis enzymes are in black and substrates are in orange. ADGRL4/ELTD1 labelled in red. (B) Fatty acid synthesis pathway qPCR results. (\*  $p \leq 0.05$ , \*\*  $p \leq 0.01$ , \*\*\*  $p \leq 0.001$ , \*\*\*\*  $p \leq 0.0001$ ) (Abbreviations: MUFA= monounsaturated fatty acid; PL=phospholipid; SFA=saturated fatty acid; TG=triglyceride).

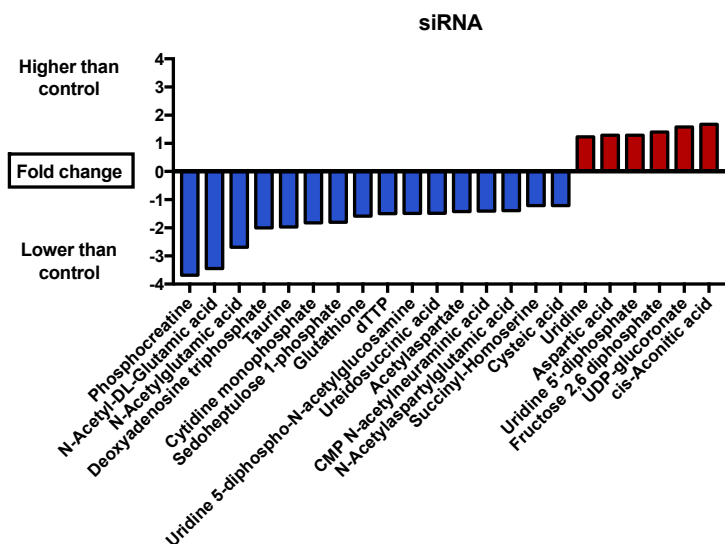

**Figure S3: Maximum fold change for selected metabolites ( $p \leq 0.05$  and fold change  $> 1.2$ ).**

| Pathway Name                                | Match | p        | FDR      | Metabolites                                                                                                                                                                      |
|---------------------------------------------|-------|----------|----------|----------------------------------------------------------------------------------------------------------------------------------------------------------------------------------|
| Alanine, aspartate and glutamate metabolism | 6/24  | 0.000002 | 1.67E-04 | N-Acetyl-L-aspartic acid, L-Aspartic acid, Oxoglutaric acid, L-Glutamine; Gamma-Aminobutyric acid; Fumaric acid;                                                                 |
| Pyrimidine metabolism                       | 8/60  | 0.000005 | 2.25E-04 | Uridine 5'-diphosphate; dCTP; L-Glutamine; Uridine; Cytidine monophosphate; Thymidine 5'-triphosphate; Thymidine; Malonic acid;                                                  |
| Arginine and proline metabolism             | 7/77  | 0.00004  | 0.007612 | L-Glutamine; L-Aspartic acid; L-Arginine; N-Acetyl-L-alanine; Phosphocreatine; Gamma-Aminobutyric acid; Fumaric acid                                                             |
| beta-Alanine metabolism                     | 4/28  | 0.001    | 0.024222 | Malonic acid; L-Aspartic acid; Gamma-Aminobutyric acid; L-Histidine                                                                                                              |
| Nitrogen metabolism                         | 4/39  | 0.004    | 0.061099 | Taurine; L-Aspartic acid; L-Glutamine; L-Histidine;                                                                                                                              |
| Citrate cycle (TCA cycle)                   | 3/20  | 0.004    | 0.061099 | Oxoglutaric acid; cis-Aconitic acid; Fumaric acid;                                                                                                                               |
| D-Glutamine and D-glutamate metabolism      | 2/11  | 0.01     | 0.15157  | L-Glutamine; Oxoglutaric acid                                                                                                                                                    |
| Cysteine and methionine metabolism          | 4/56  | 0.01     | 0.15157  | O-Succinyl-L-homoserine; Glutathione; Cysteic acid; L-Aspartic acid                                                                                                              |
| Amino sugar and nucleotide sugar metabolism | 5/88  | 0.01     | 0.15157  | Uridine diphosphate glucuronic acid; Uridine diphosphate-N-acetylglucosamine; Glucose 1-phosphate; Cytidine monophosphate N-acetylneuraminic acid; Uridine diphosphategalactose; |
| Butanoate metabolism                        | 3/40  | 0.03     | 0.24117  | Gamma-Aminobutyric acid; Oxoglutaric acid; Fumaric acid                                                                                                                          |
| Galactose metabolism                        | 3/41  | 0.03     | 0.24117  | Glucose 1-phosphate; Uridine diphosphategalactose; Sorbitol                                                                                                                      |
| Aminoacyl-tRNA biosynthesis                 | 4/75  | 0.03     | 0.24117  | L-Histidine; L-Arginine; Glutamine; L-Aspartic acid;                                                                                                                             |
| Histidine metabolism                        | 3/44  | 0.04     | 0.24117  | L-Histidine; L-Aspartic acid; Oxoglutaric acid;                                                                                                                                  |
| Ascorbate and aldarate metabolism           | 3/45  | 0.04     | 0.24117  | Uridine diphosphate glucuronic acid; D-Glucarate; Oxoglutaric acid;                                                                                                              |
| Taurine and hypotaurine metabolism          | 2/20  | 0.04     | 0.24699  | taurine; cysteic acid                                                                                                                                                            |
| Pentose and glucuronate interconversions    | 3/53  | 0.06     | 0.31668  | D-Xylulose; Glucose 1-phosphate; Uridine diphosphate glucuronic acid                                                                                                             |
| Glycolysis or Gluconeogenesis               | 2/31  | 0.1      | 0.47174  | L-Aspartic acid; Fumaric acid                                                                                                                                                    |

**Table S1:** Metabolite pathway analysis with extended range of metabolites (FC >1.2 irrespective of *p* value).

## Supplementary dataset

supplementary\_raw\_output\_metabolomics.xlsx

## Supplementary methods

| Gene name        | Forward primer (5'-3')     | Reverse primer (5'-3')        |
|------------------|----------------------------|-------------------------------|
| ACACA            | AACGTGAAGACGGATAAGCAG      | CTTCTTCGGAGAATCTGACCA         |
| ACACB            | AGTTCGCCGACTTCCAT          | TCTTCCACTCCAGGATGTCA          |
| ACLY             | CCAGCAGGACAGCATCTTTT       | GGATCTTGGACTTGGGACTG          |
| ACTB             | ATGCTCTCCCTCACGCCATC       | CACGCACGATTTCCCTCTCA          |
| CD36             | GTGCCTATTCTTTGGCTTAATGA    | TTACTTGACTTCTGAACATGTTTG<br>C |
| DLL4             | CCCTGGCAATGTACTTGTGAT      | TGGTGGGTGCAGTAGTTGAG          |
| ADGRL4/ELTD<br>1 | GCTCAAACCCACCCACATTAT      | CACAGCCCTCTGAAGACCAG          |
| FASN             | CAGGCACACACAGGATGGAC       | CGGAGTGAATCTGGGTTGA           |
| GAPDH            | AGCCACATCGCTCAGACAC        | GCCCAATACGACCAAATCC           |
| HES2             | CCAACTGCTCGAAGCTAGAGA      | AGCGCACGGTCATTTCCAG           |
| JAG1             | GAATGGCAACAAAACCTTGCAT     | AGCCTTGTCGGCAAATAGC           |
| KIT              | AATCCTCTCGTCAAACTGAAG<br>G | CCATCTCGCTTATCCAACAATGA       |
| SCD              | GACCTGCTTGCTGATCCTGT       | CCATTCACGAAGCATCTCAC          |

Supplementary methods Table 1: qPCR primer sequences.

| Target | Type | Dilution | Company |
|--------|------|----------|---------|
|--------|------|----------|---------|

| <b>Primary antibodies</b>   |                       |          |                                                     |
|-----------------------------|-----------------------|----------|-----------------------------------------------------|
| ADGRL4/ELTD1                | Mouse IgG2 monoclonal | 10 µg/mL | Professor Alison Banham, Oxford University (184.11) |
| DLL4                        | Rat IgG2 monoclonal   | 10 µg/mL | R&D Systems (MAB1506)                               |
| JAG1                        | Mouse IgG2 monoclonal | 1 in 200 | Professor Alison Banham, Oxford University (J1-65D) |
| KIT                         | Mouse IgG1 monoclonal | 1 in 200 | Invitrogen (17-1178-41)                             |
| IgG1 isotype control        | Mouse IgG1 monoclonal | 10 µg/mL | Invitrogen (17-4714-41)                             |
| IgG2 isotype control        | Mouse IgG2 monoclonal | 10 µg/mL | Invitrogen (17-4724-41)                             |
| <b>Secondary antibodies</b> |                       |          |                                                     |
| anti-mouse APC              | Goat IgG              | 1 in 100 | Invitrogen (A-865)                                  |
| anti-rat APC                | Goat IgG              | 1 in 100 | Invitrogen (A10540)                                 |

Supplementary methods Table 2: FACS antibodies.
